# Supplementary material for: Highly efficient and recyclable chiral phosphine-functionalized polyether ionic liquids for asymmetric hydrogenation of β-keto esters
Source: Royal Society of Chemistry journal article supplement (doi:10.1039/d3ra05087d), 2023-01-01
Supplement: d3ra05087d1.pdf [file d3ra05087d1.pdf]

## Supporting Information

### Highly Efficient and Recyclable Chiral Phosphine-Functionalized Polyether Ionic Liquids for Asymmetric Hydrogenation of $\beta$ -keto esters

Fan Wang <sup>a, b</sup>, Shuai Zhang <sup>b</sup>, Congxia Xie <sup>a</sup>, Xin Jin <sup>b, \*</sup>

<sup>a</sup> College of Chemistry and Molecular Engineering, Qingdao University of Science and Technology, 53 Zhengzhou Road, Qingdao 266042, China

<sup>b</sup> College of Chemical Engineering, Qingdao University of Science and Technology, 53 Zhengzhou Road, Qingdao 266042, China

Corresponding author e-mail: jinx1971@163.com.

#### Table of Contents

|                                                                                                      |            |
|------------------------------------------------------------------------------------------------------|------------|
| 1. Calculation method for TON and TTON in Fig. 4 .....                                               | (Page S2)  |
| 2. The air stability of Ru-3a catalyst .....                                                         | (Page S3)  |
| 3. The thermal stability of Ru-3a catalyst .....                                                     | (Page S4)  |
| 4. The moisture stability of Ru-3a catalyst .....                                                    | (Page S5)  |
| 5. Comparison of our work with previous reports for asymmetric hydrogenation of $\beta$ -keto esters | (Page S6)  |
| 6. GC charts of the products .....                                                                   | (Page S7)  |
| 7. Characterization of the products.....                                                             | (Page S8)  |
| 8. NMR spectra of the CPF-PILs .....                                                                 | (Page S10) |
| 9. NMR spectra of the products .....                                                                 | (Page S13) |
| 10. HRMS spectra of the CPF-PILs .....                                                               | (Page S18) |
| 11. Reference .....                                                                                  | (Page S21) |

**1. Calculation method for TON and TTON in Fig. 4**

$$TON = \frac{n(MAA)}{n(catalyst)} \times Yield \quad (1)$$

$$TTON = \sum_{m=1}^{12} TON_m \quad (2)$$

*m* represents the running numbers of the catalyst.

## 2. The air stability of Ru-3a catalyst

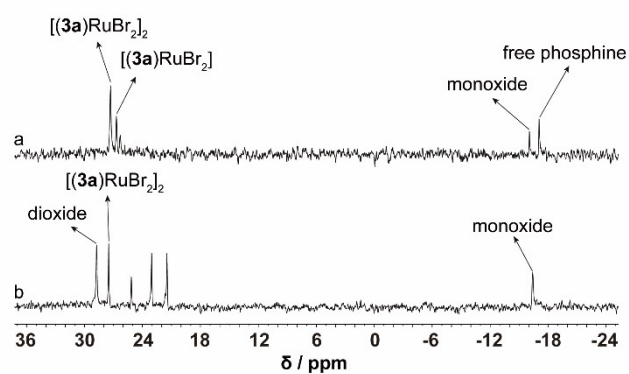

**Fig. S1**  $^{31}\text{P}$  NMR spectra of Ru-**3a** catalyst (202 MHz,  $\text{DMSO-}d_6$ ). (a) fresh catalyst; (b) air stability testing, condition: 2 mL MeOH,  $T = 60\text{ }^\circ\text{C}$ ,  $t = 20\text{ h}$ , 4.6 MPa nitrogen atmosphere with 0.5% oxygen.

### 3. The thermal stability of Ru-3a catalyst

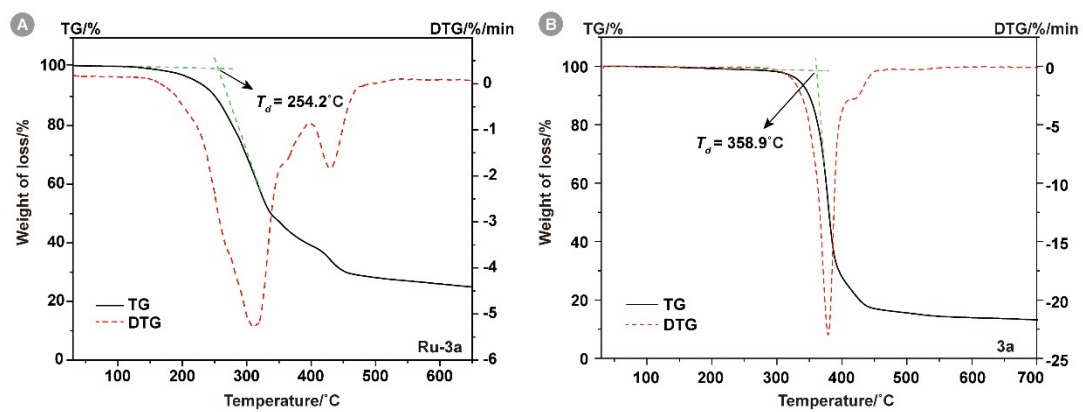

Fig. S2 TG profiles of Ru-3a catalyst (A) and 3a (B).

#### 4. The moisture stability of Ru-3a catalyst

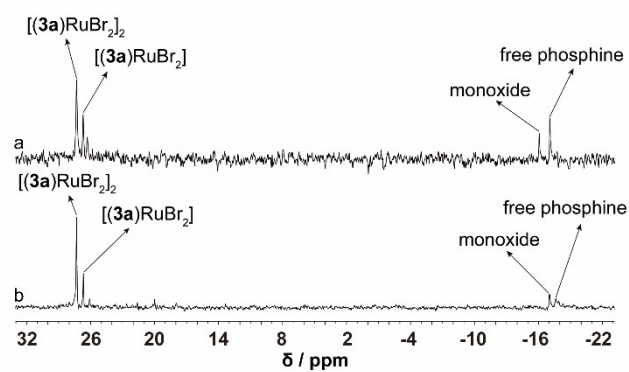

**Fig. S3**  $^{31}\text{P}$  NMR spectra of Ru-3a catalyst (202 MHz,  $\text{DMSO-}d_6$ ). (a) fresh catalyst; (b) moisture stability testing, condition: 2 mL methanol solution containing 3wt% water,  $T = 60^\circ\text{C}$ ,  $t = 20$  h,  $P(\text{H}_2) = 4.6$  MPa.

## 5. Comparison of our work with previous reports for asymmetric hydrogenation of $\beta$ -keto esters

**Table S1** Comparison of our work with previous reports for asymmetric hydrogenation of  $\beta$ -keto esters

| Entry           | System           | Reaction Medium                                | Ligand    | Carrier IL/S <sup>a</sup> (mol%) | TOF <sup>b</sup> (h <sup>-1</sup> ) | ee    | TTON  | Ru Loss (%) | Ref.            |
|-----------------|------------------|------------------------------------------------|-----------|----------------------------------|-------------------------------------|-------|-------|-------------|-----------------|
| 1 <sup>c</sup>  | IL-homogeneous   | [BMIm][BF <sub>4</sub> ]/MeOH                  | L-1       | 580                              | 4.5                                 | 98.3  | 440   | 0.02        | 1               |
| 2 <sup>c</sup>  | IL-homogeneous   | [BMIm][PF <sub>6</sub> ]/MeOH                  | L-2       | 528                              | 4.5                                 | 99.3  | 482   | 0.04        | 1               |
| 3 <sup>d</sup>  | IL-homogeneous   | [BMIm][BF <sub>4</sub> ]/MeOH                  | L-2       | 1068                             | 4.9                                 | 97.2  | 335   | 0.02        | 2               |
| 4 <sup>d</sup>  | IL-homogeneous   | [BMIm][BF <sub>4</sub> ]/MeOH                  | L-3       | 1068                             | 4.9                                 | 99.5  | 310   | 0.04        | 2               |
| 5 <sup>e</sup>  | IL-homogeneous   | [Bmim][NTf <sub>2</sub> ]/MeOH                 | L-4       | 769                              | 50                                  | 98    | 375   | 0.27        | 3               |
| 6 <sup>e</sup>  | IL-homogeneous   | [Bmim][NTf <sub>2</sub> ]/MeOH                 | L-5       | 769                              | 50                                  | 97    |       |             | 3               |
| 7 <sup>e</sup>  | IL-homogeneous   | [Bmim][NTf <sub>2</sub> ]/MeOH                 | BINAP     | 769                              | 50                                  | 98    | 228   | 4.63        | 3               |
| 8 <sup>f</sup>  | IL-homogeneous   | [N <sub>6222</sub> ][NTf <sub>2</sub> ]/MeOH   | BINAP     | 1335 <sup>g</sup>                |                                     | 98.3  |       |             | 4               |
| 9 <sup>h</sup>  | IL-homogeneous   | [BMIm][BF <sub>4</sub> ]/scCO <sub>2</sub>     | BINAP     | 209                              | 100                                 | 97    |       |             | 5               |
| 10 <sup>i</sup> | IL-biphasic      | [BMIm][BF <sub>4</sub> ]                       | L-6       | 31                               | 66.7                                | 86    | 2000  |             | 6               |
| 11 <sup>i</sup> | IL-biphasic      | [BPy][NTf <sub>2</sub> ]                       | L-7       | 20                               | 66.7                                | 83    |       |             | 6               |
| 12 <sup>j</sup> | IL-biphasic      | [BMIm][PF <sub>6</sub> ]/ <i>i</i> -PrOH       | BINAP     | 3469                             | 21                                  | 97    | 14    | 0           | 7               |
| 13 <sup>k</sup> | SILP-catalysis   | SiO <sub>2</sub> -[EMIM]NTf <sub>2</sub> /MeOH | L-8       |                                  |                                     | 75-80 | 2500  |             | 8               |
| 14 <sup>l</sup> | aqueous biphasic | H <sub>2</sub> O                               | L-6       | none                             | 66.7                                | 99    | 8000  |             | 9               |
| 15 <sup>m</sup> | aqueous biphasic | H <sub>2</sub> O                               | L-9       | none                             | 62.5                                | 94    | 2970  |             | 10              |
| 16 <sup>n</sup> | aqueous biphasic | H <sub>2</sub> O                               | L-10      | none                             | 50                                  | 94    | 5000  |             | 11              |
| 17 <sup>o</sup> | thermoregulated  | EtOH/1,4-dioxane                               | L-11      | none                             | 10                                  | 97.8  | 383   |             | 12              |
| 18              | HCBS system      | MeOH                                           | <b>3a</b> | none                             | 333                                 | 99    | 12000 | 0.3-0.4     | <b>Our work</b> |

<sup>a</sup> Molar ratio of carrier IL to substrate. <sup>b</sup> Calculated based on the total reaction time. <sup>c</sup> V(IL/Co-solvent) = 0.5/0.5 mL/mL, n(S)/n(Ru) = 100/1, n(L)/n(Ru) = 1.1/1, P(H<sub>2</sub>) = 10.34 MPa, t = 22 h, T = R.T., MAA as the substrate. <sup>d</sup> V(IL/Co-solvent) = 0.5/0.5 mL/mL, n(S)/n(Ru) = 100/1, n(L)/n(Ru) = 1.1/1, P(H<sub>2</sub>) = 9.65 MPa, t = 20 h, T = R.T., ethyl benzoylacetate as the substrate. <sup>e</sup> m(IL) = 1 g, V(MeOH) = 1 mL, n(S)/n(Ru) = 100/1, n(L)/n(Ru) = 1/1, P(H<sub>2</sub>) = 4 MPa, t = 20 h, T = 60°C, MAA as the substrate. <sup>f</sup> V(IL/Co-solvent) = 8.5/8.5 mL/mL, n(S)/n(Ru) = 1580/1, n(L)/n(Ru) = 1/1, P(H<sub>2</sub>) = 5 MPa, T = 60°C, 1 wt.% N<sub>6222</sub> Br, MAA as the substrate. <sup>g</sup> TOF value at 90% conversion. <sup>h</sup> V(IL) = 0.5 mL, n(S)/n(Ru) = 200/1, n(L)/n(Ru) = 1.5/1, P(H<sub>2</sub>) = 2.74 MPa, P(CO<sub>2</sub>) = 8.41 MPa, t = 1 h, T = 75°C, MAA as the substrate. <sup>i</sup> V(IL) = 1 mL, n(S)/n(Ru) = 1000/1, P(H<sub>2</sub>) = 4 MPa, t = 15 h, T = 50°C, ethyl acetoacetate (EAA) as the substrate. <sup>j</sup> V(IL) = 2 mL, V(*i*-PrOH) = 2 mL, n(S)/n(Ru) = 140/1, P(H<sub>2</sub>) = 4 MPa, t = 20 min, T = 60°C, MAA as the substrate. <sup>k</sup> A continuous gas-phase reaction: P(H<sub>2</sub>) = 1 MPa, t = 70 h, T = 105°C, MAA as the substrate. <sup>l</sup> V(H<sub>2</sub>O) = 1 mL, n(S)/n(Ru) = 1000/1, n(L)/n(Ru) = 1/1, P(H<sub>2</sub>) = 40 bar, t = 15 h, T = 50°C, EAA as the substrate. <sup>m</sup> V(H<sub>2</sub>O) = 1 mL, n(S)/n(Ru) = 1000/1, n(L)/n(Ru) = 1/1, P(H<sub>2</sub>) = 4 MPa, t = 16 h, T = 50°C, EAA as the substrate. <sup>n</sup> V(H<sub>2</sub>O) = 2 mL, n(S)/n(Ru) = 1000/1, n(Nal)/n(Ru) = 100/1, P(H<sub>2</sub>) = 4 MPa, t = 20 h, T = 60°C, MAA as the substrate. <sup>o</sup> n(S)/n(Ru) = 100/1, n(L)/n(Ru) = 1.1/1, P(H<sub>2</sub>) = 4 MPa, t = 10 h, T = 60°C, MAA as the substrate.

## 6. GC charts of the products

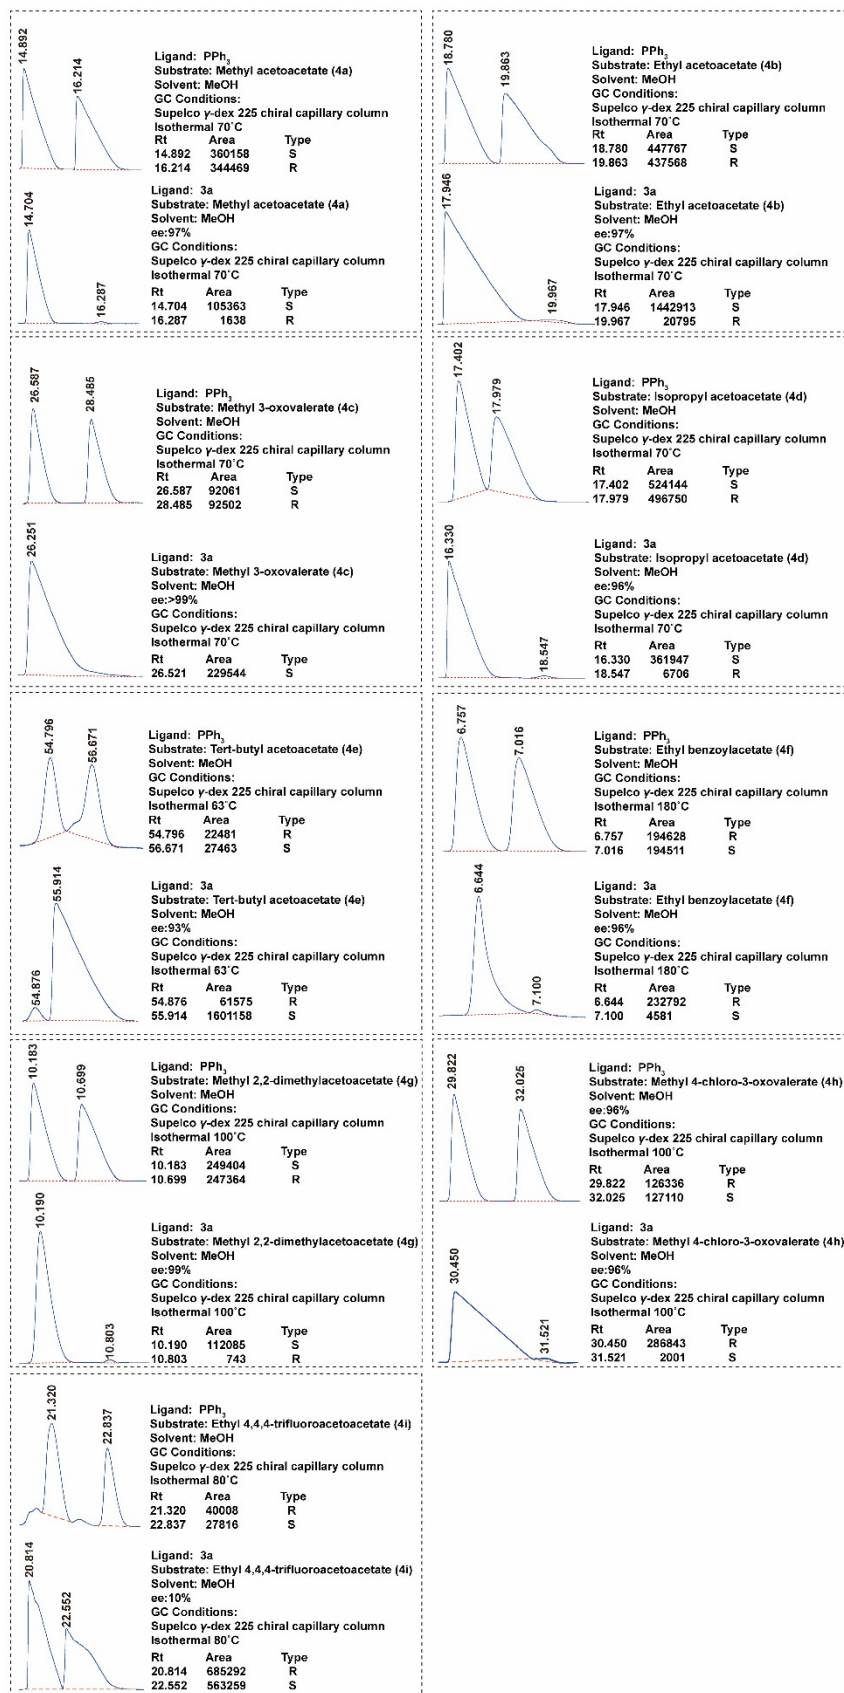

Fig. S4 GC charts of the products

## 7. Characterization of the products

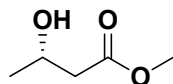

**methyl (S)-3-hydroxybutyrate (5a)**  $^1\text{H}$  NMR (500 MHz,  $\text{CDCl}_3$ ):  $\delta$  = 4.233–4.176 (m, 1H), 3.717 (s, 3H), 2.935 (br, 1H), 2.524–2.408 (m, 2H), 1.235 (d, 3H,  $J$  = 6.0 Hz).

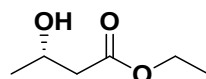

**ethyl (S)-3-hydroxybutyrate (5b)**  $^1\text{H}$  NMR (500 MHz,  $\text{CDCl}_3$ ):  $\delta$  = 4.228–4.150 (m, 3H), 3.020 (br, 1H), 2.509–2.392 (m, 2H), 1.278 (t, 3H,  $J$  = 7 Hz), 1.231 (d, 3H,  $J$  = 6 Hz).

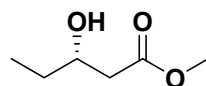

**methyl (S)-3-hydroxyvalerate (5c)**  $^1\text{H}$  NMR (500 MHz,  $\text{CDCl}_3$ ):  $\delta$  = 3.970–3.912 (m, 1H), 3.716 (s, 3H), 2.865 (d, 1H,  $J$  = 4 Hz), 2.544–2.390 (m, 2H), 1.639–1.454 (m, 2H), 0.966 (t, 3H,  $J$  = 7.5 Hz).

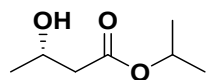

**isopropyl (S)-3-hydroxybutyrate (5d)**  $^1\text{H}$  NMR (500 MHz,  $\text{CDCl}_3$ ):  $\delta$  = 5.043 (m, 1H), 4.216–4.153 (m, 1H), 3.394 (br, 1H), 2.474–2.379 (m, 2H), 1.254–1.214 (m, 9H).

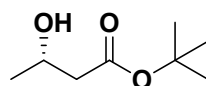

**tert-butyl (S)-3-hydroxybutyrate (5e)**  $^1\text{H}$  NMR (500 MHz,  $\text{CDCl}_3$ ):  $\delta$  = 4.178–4.116 (m, 1H), 3.171 (br, 1H), 2.435–2.307 (m, 2H), 1.467 (s, 9H), 1.207 (d, 3H,  $J$  = 6.5 Hz).

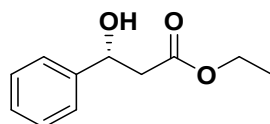

**ethyl (R)-3-hydroxy-3-phenylpropanoate (5f)**  $^1\text{H}$  NMR (500 MHz,  $\text{CDCl}_3$ ):  $\delta$  = 7.393–7.339 (m, 4H), 7.303–7.268 (m, 1H), 5.138 (m, 1H), 4.190 (q, 2H,  $J$  = 7 Hz), 3.251 (br, 1H), 2.787–2.689 (m, 2H), 1.265 (t, 3H,  $J$  = 7 Hz).

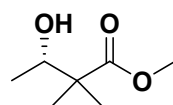

**methyl (S)-2,2-dimethyl-3-hydroxybutyrate (5g)**  $^1\text{H}$  NMR (500 MHz,  $\text{CDCl}_3$ ):  $\delta$  = 3.867 (q, 1H,  $J$  = 6.5 Hz), 3.709 (s, 3H), 2.629 (br, 1H), 1.184–1.138 (m, 9H).



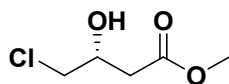

**methyl (*R*)-4-chloro-3-hydroxybutyrate (5h)**  $^1\text{H}$  NMR (500 MHz,  $\text{CDCl}_3$ ):  $\delta$  = 4.286–4.252 (m, 1H), 3.732 (s, 1H), 3.644–3.582 (m, 2H), 3.241 (br, 1H), 2.697–2.598 (m, 2H).

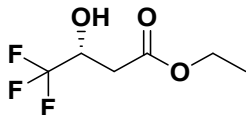

**ethyl (*R*)-4,4,4-trifluoro-3-hydroxybutyrate (5i)**  $^1\text{H}$  NMR (500 MHz,  $\text{CDCl}_3$ ):  $\delta$  = 4.486–4.420 (m, 1H), 4.210 (q, 2H,  $J$  = 7 Hz), 4.14 (br, 1H), 2.738–2.642 (m, 2H), 1.288 (t, 3H,  $J$  = 7 Hz).

## 8. NMR spectra of the CPF-PILs

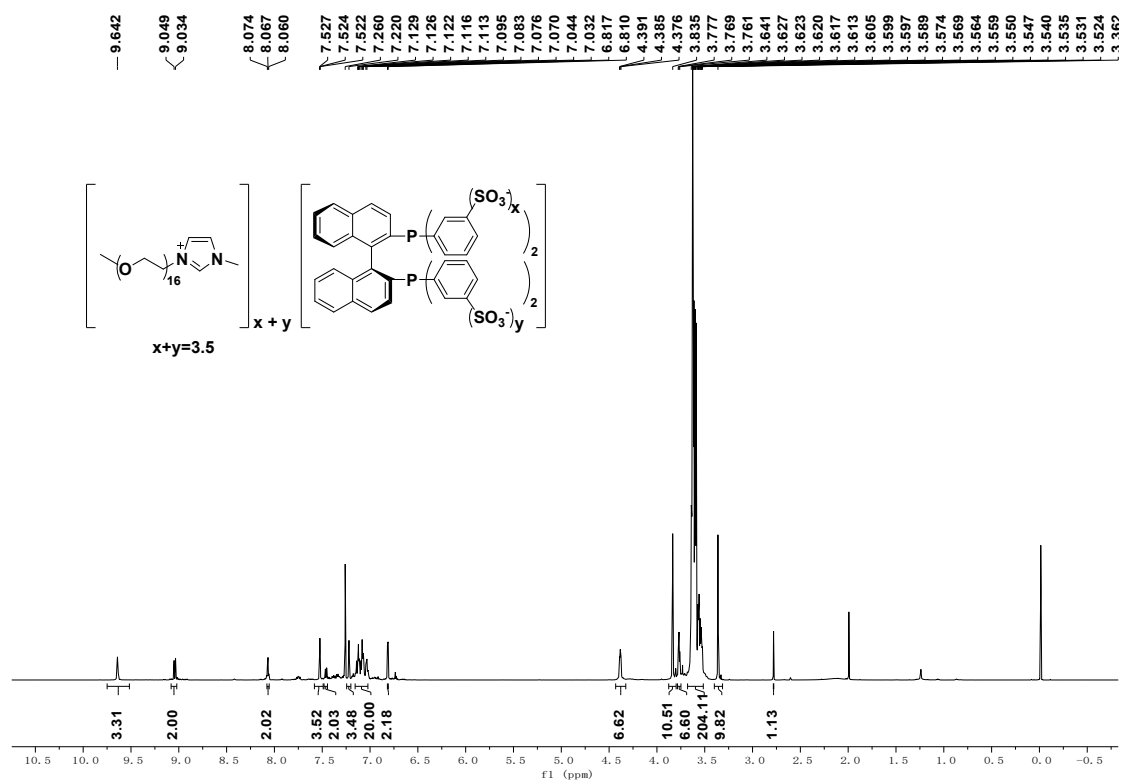

Fig. S5  $^1\text{H NMR}$  (500 MHz) spectra of the 3a in  $\text{CDCl}_3$

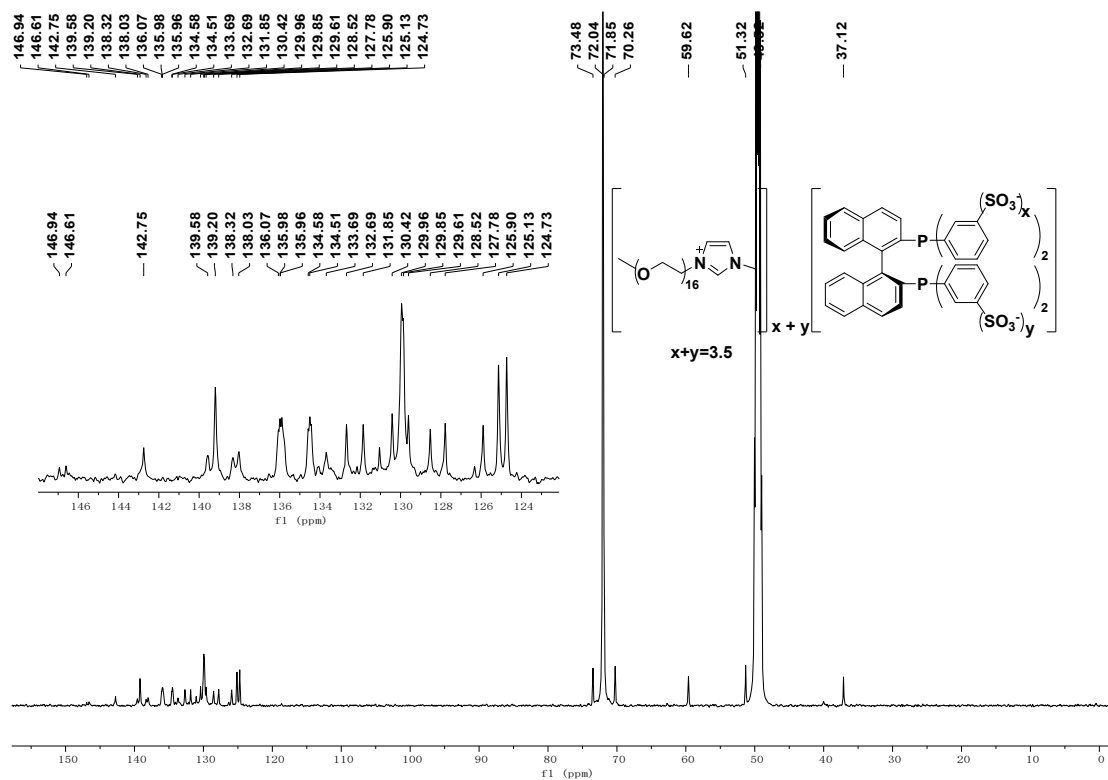

Fig. S6  $^{13}\text{C NMR}$  (126 MHz) spectra of the 3a in  $\text{CD}_3\text{OD}$

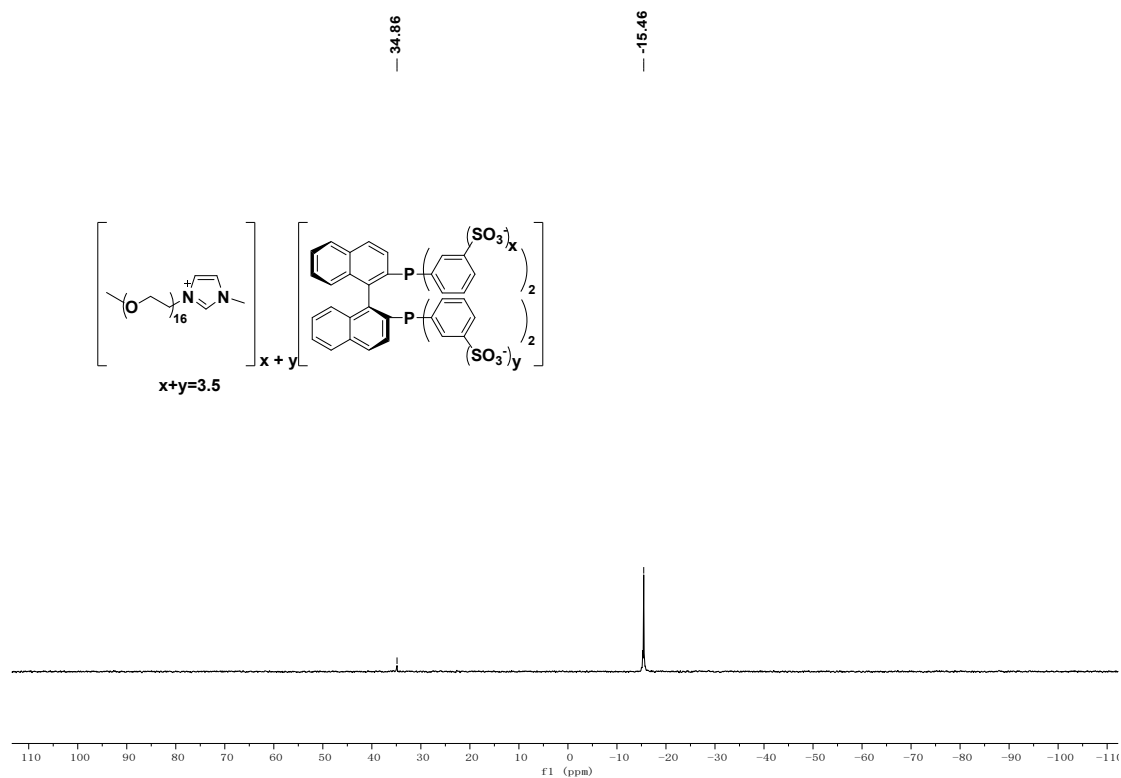

Fig. S7 <sup>31</sup>P NMR (202 MHz) spectra of the **3a** in D<sub>2</sub>O

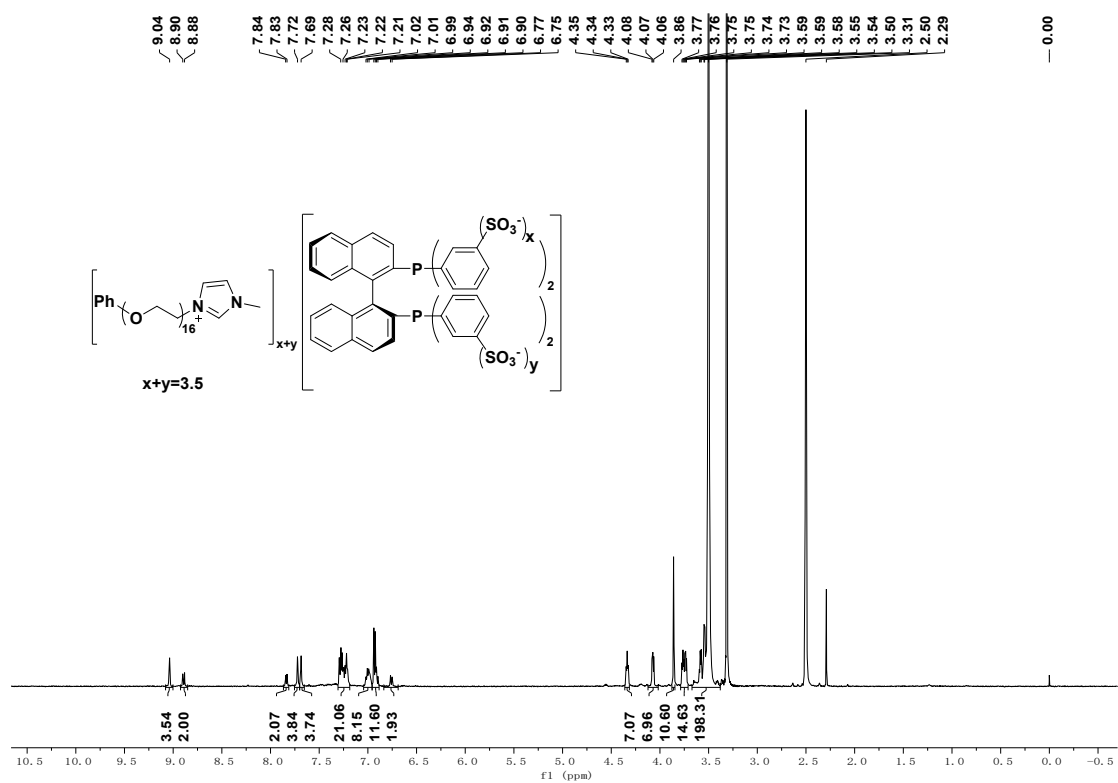

Fig. S8 <sup>1</sup>H NMR (500 MHz) spectra of the **3b** in DMSO-*d*<sub>6</sub>

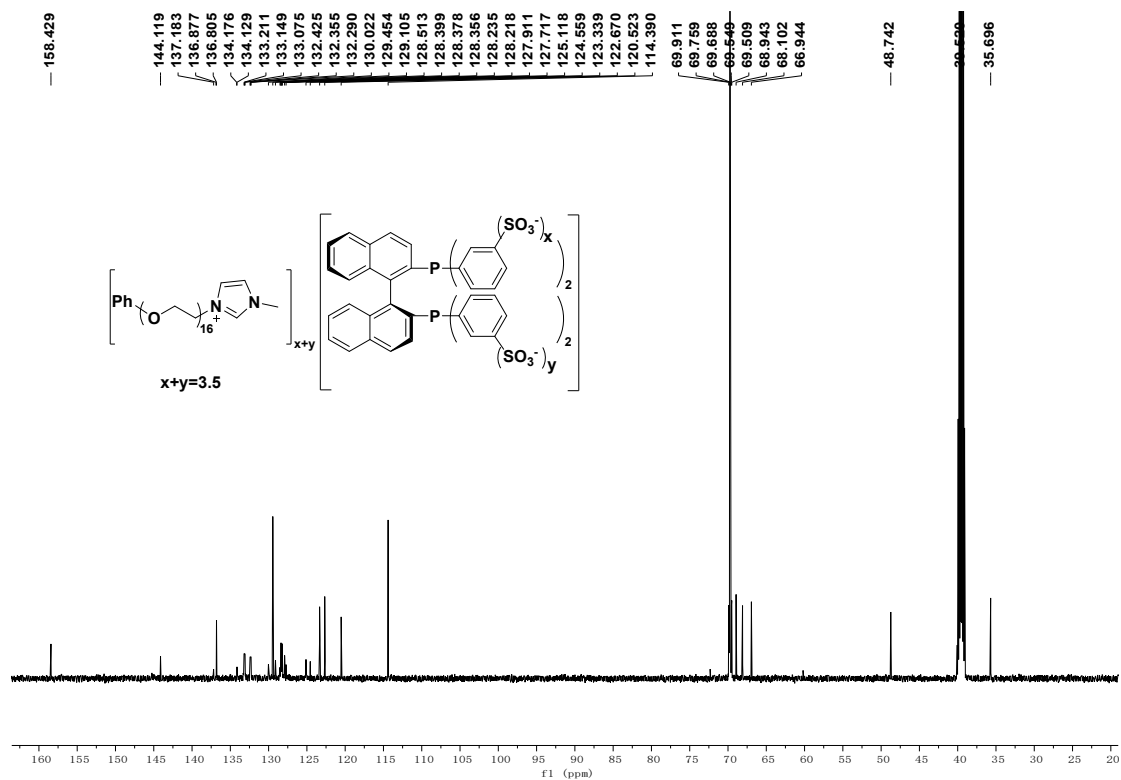

Fig. S9  $^{13}\text{C}$  NMR (151 MHz) spectra of the **3b** in  $\text{DMSO-}d_6$

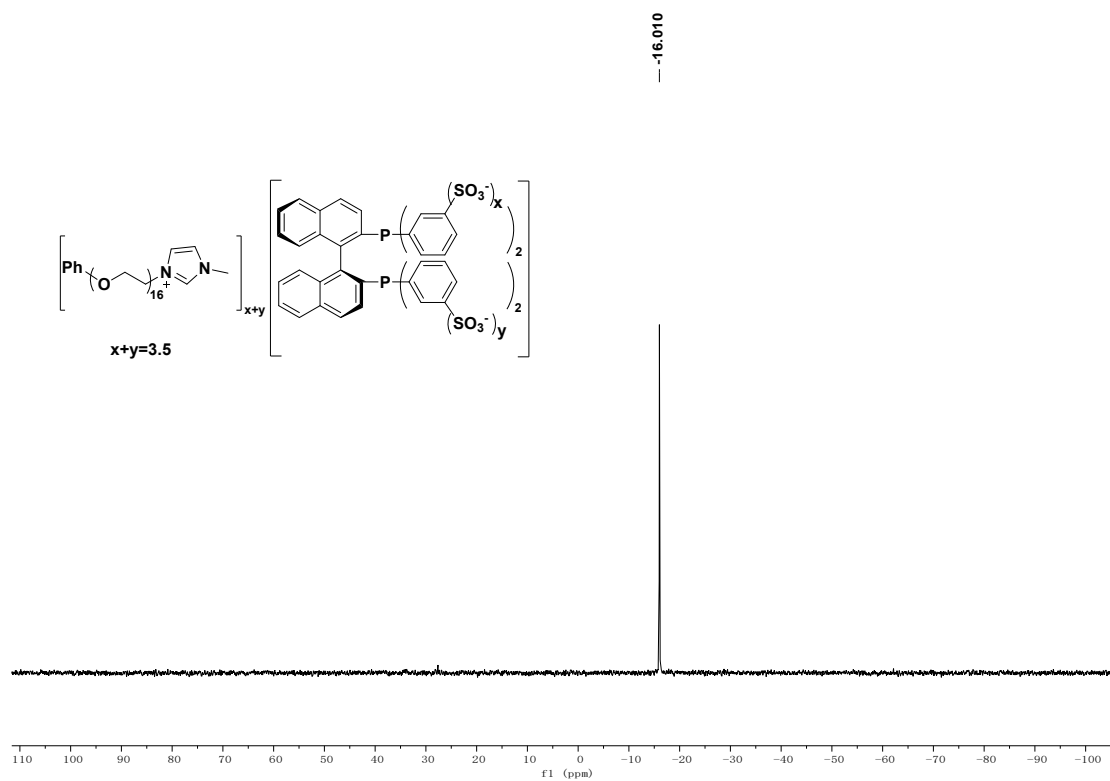

Fig. S10  $^{31}\text{P}$  NMR (202 MHz) spectra of the **3b** in  $\text{CDCl}_3$

## 9. NMR spectra of the products

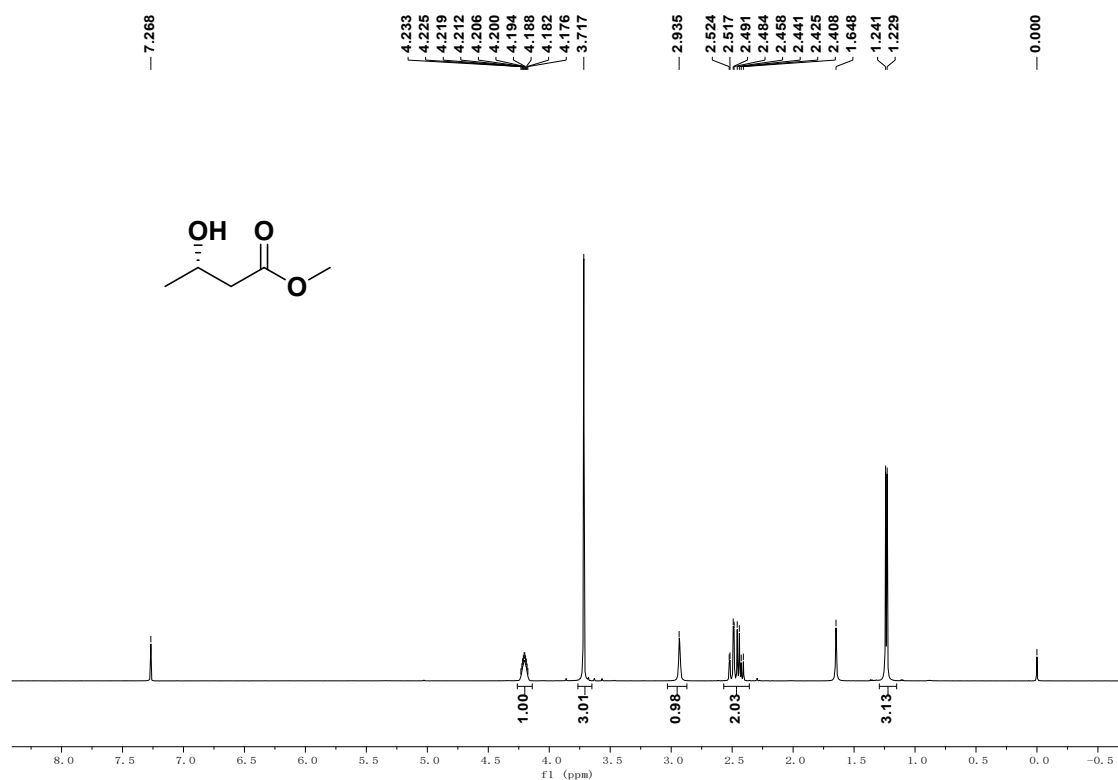

Fig. S11 <sup>1</sup>H NMR (500 MHz) spectra of the methyl (*S*)-3-hydroxybutyrate (5a) in CDCl<sub>3</sub>

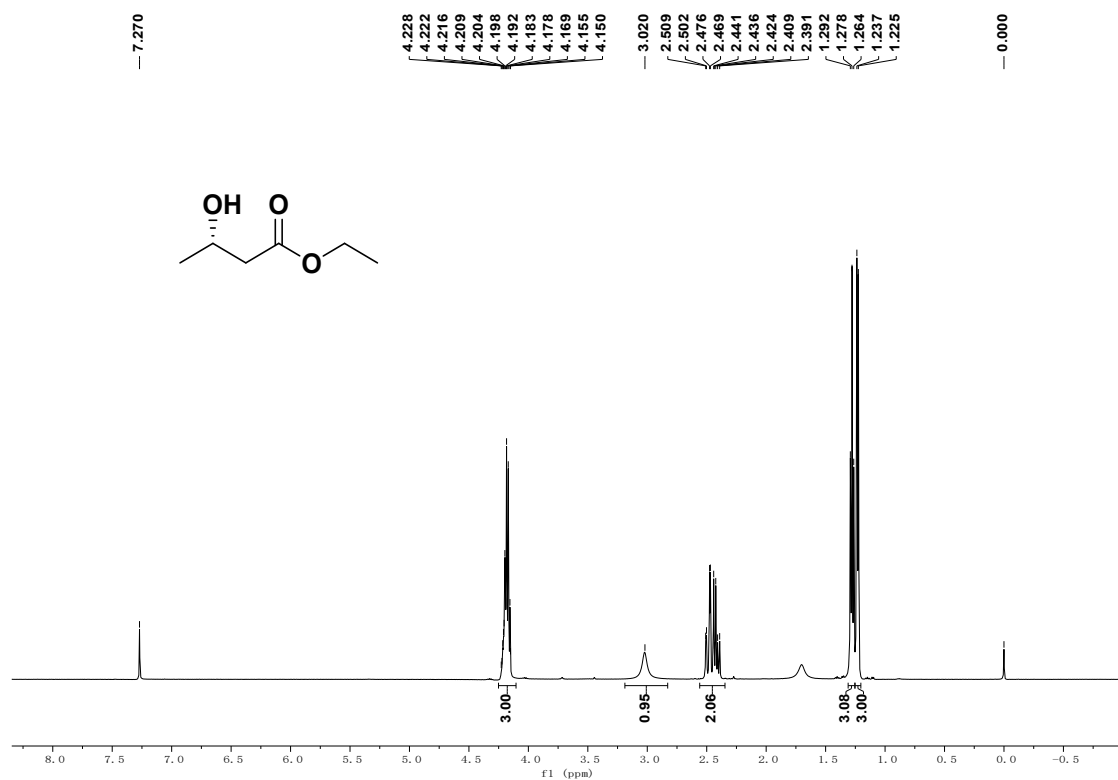

Fig. S12 <sup>1</sup>H NMR (500 MHz) spectra of the ethyl (*S*)-3-hydroxybutyrate (5b) in CDCl<sub>3</sub>

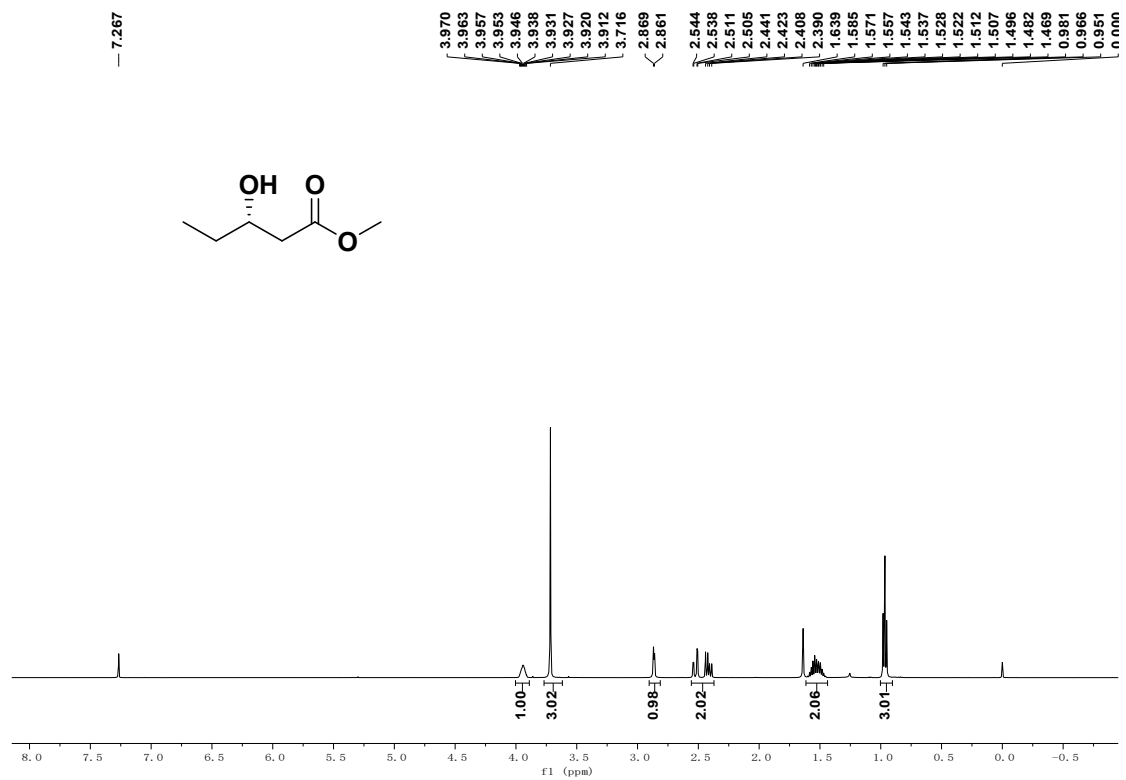

Fig. S13  $^1\text{H}$  NMR (500 MHz) spectra of the methyl (*S*)-3-hydroxyvalerate (**5c**) in  $\text{CDCl}_3$

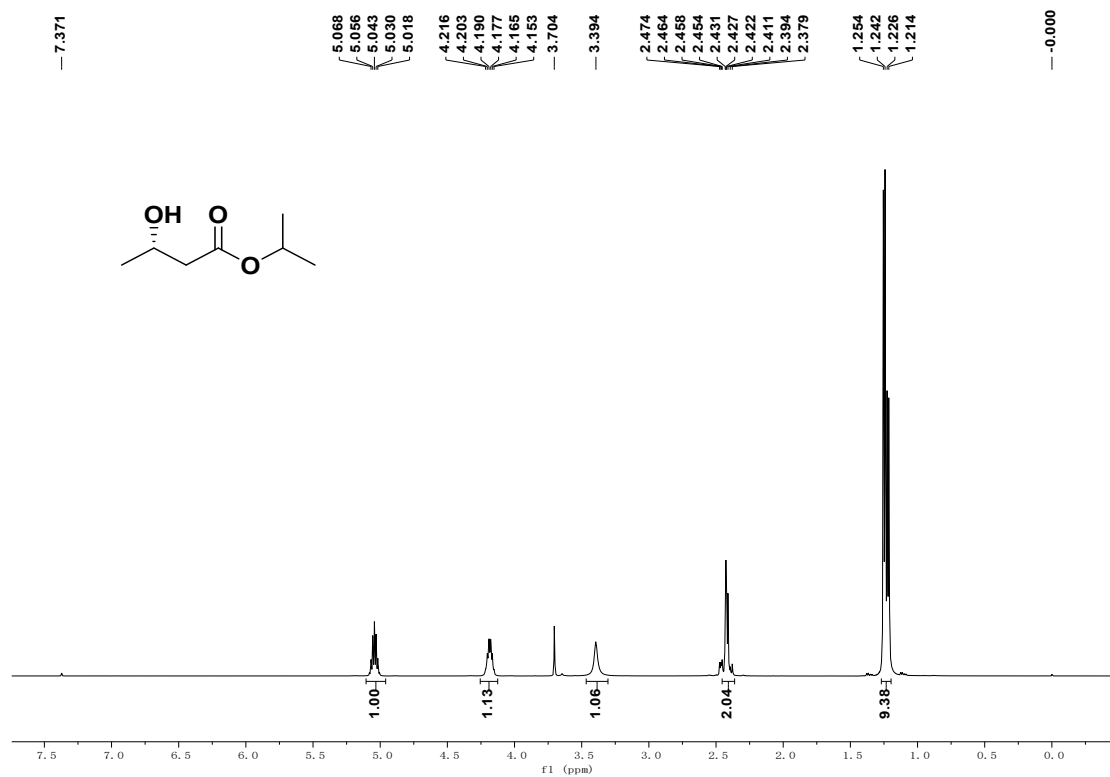

Fig. S14  $^1\text{H}$  NMR (500 MHz) spectra of the isopropyl (*S*)-3-hydroxybutyrate (**5d**) in  $\text{CDCl}_3$

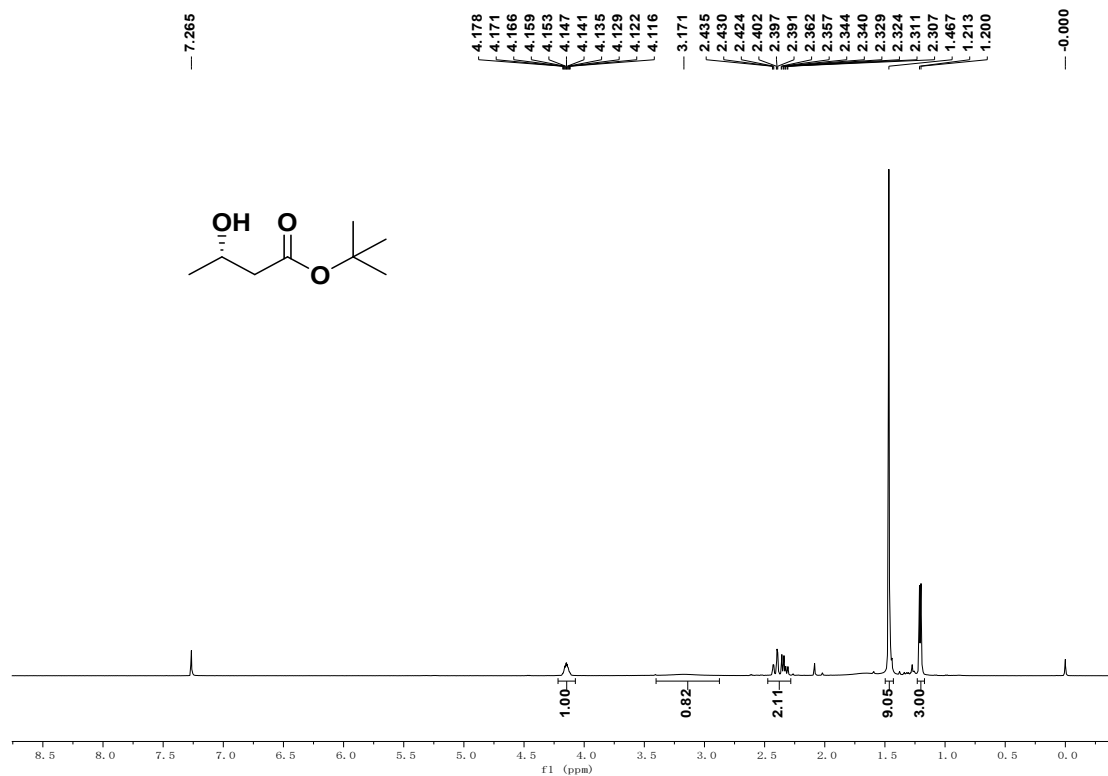

Fig. S15 <sup>1</sup>H NMR (500 MHz) spectra of the tert-butyl (*S*)-3-hydroxybutyrate (**5e**) in CDCl<sub>3</sub>

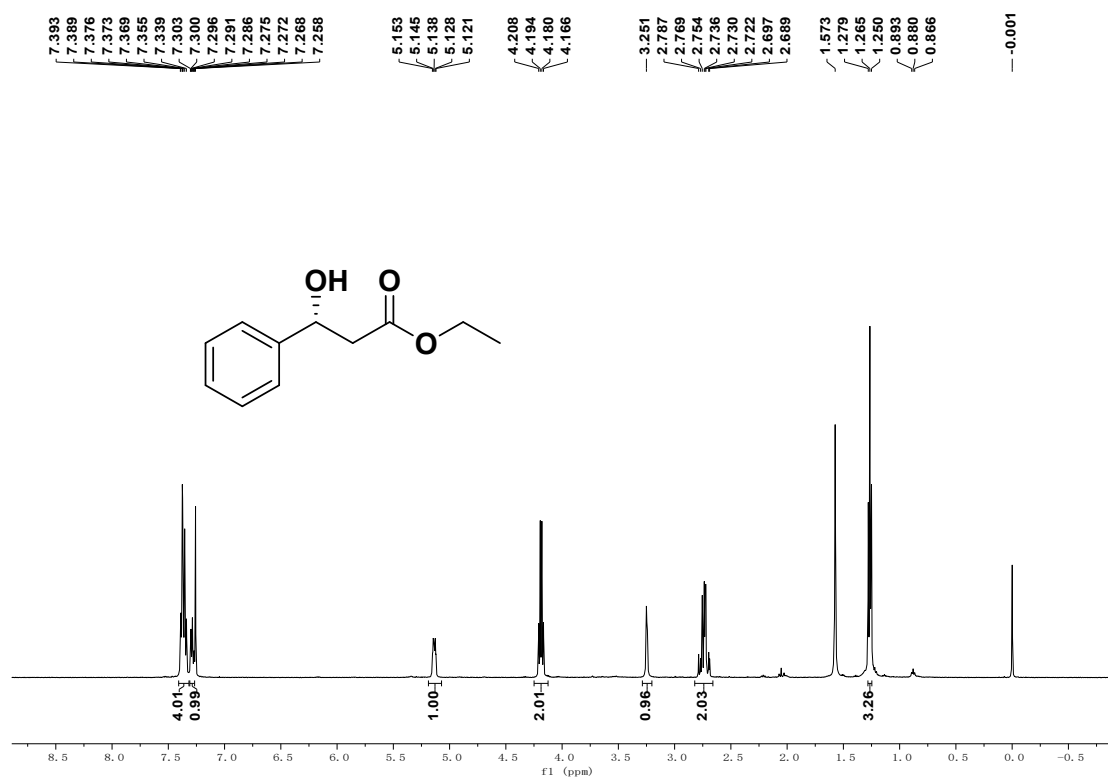

Fig. S16 <sup>1</sup>H NMR (500 MHz) spectra of the ethyl (*R*)-3-hydroxy-3-phenylpropanoate (**5f**) in CDCl<sub>3</sub>

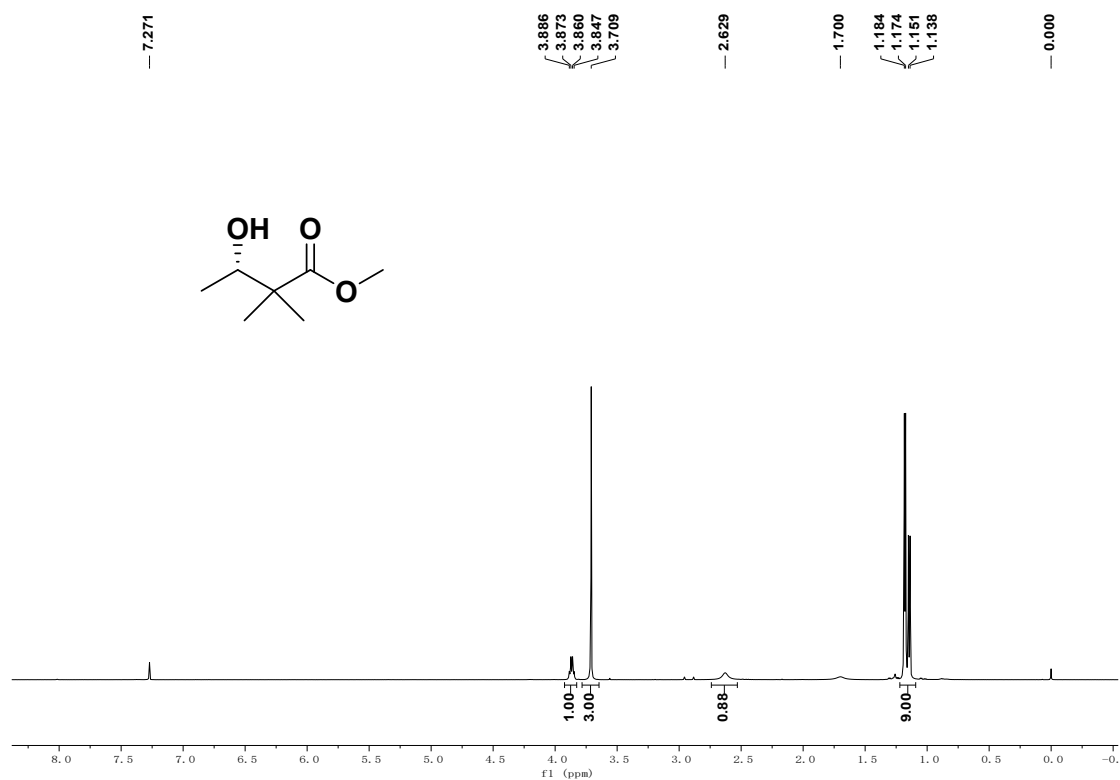

Fig. S17 <sup>1</sup>H NMR (500 MHz) spectra of the methyl (S)-2,2-dimethyl-3-hydroxybutyrate (5g) in CDCl<sub>3</sub>

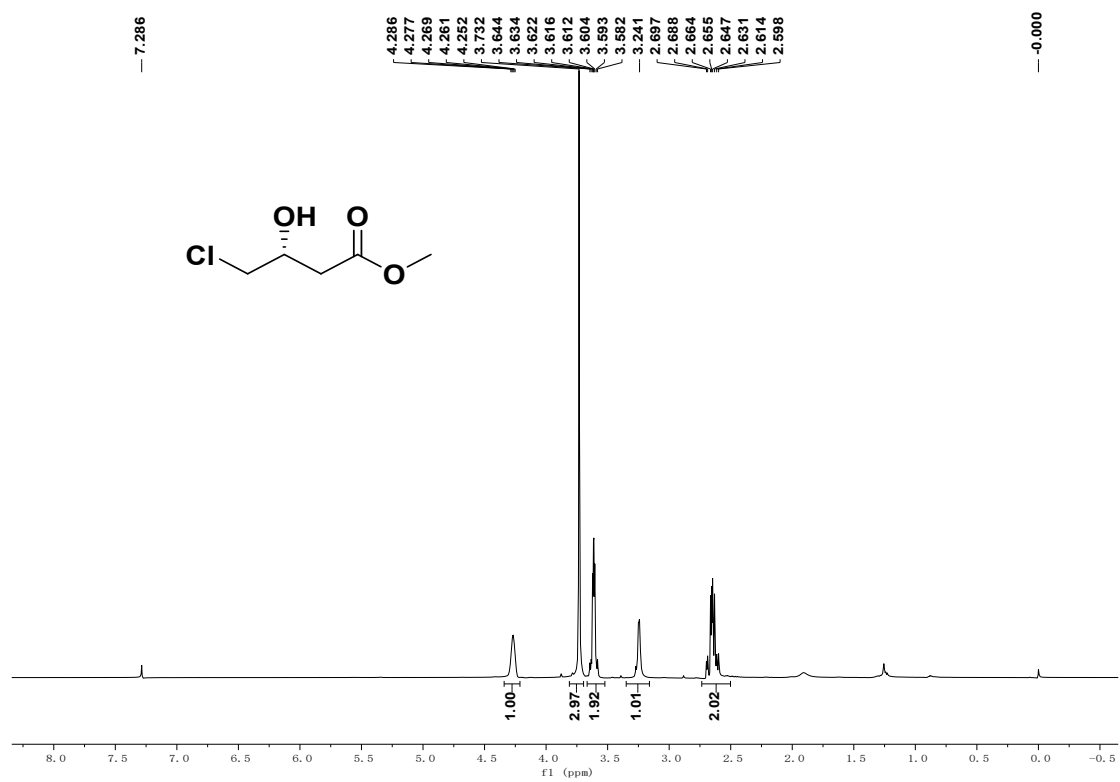

Fig. S18 <sup>1</sup>H NMR (500 MHz) spectra of the methyl (R)-4-chloro-3-hydroxybutyrate (5h) in CDCl<sub>3</sub>



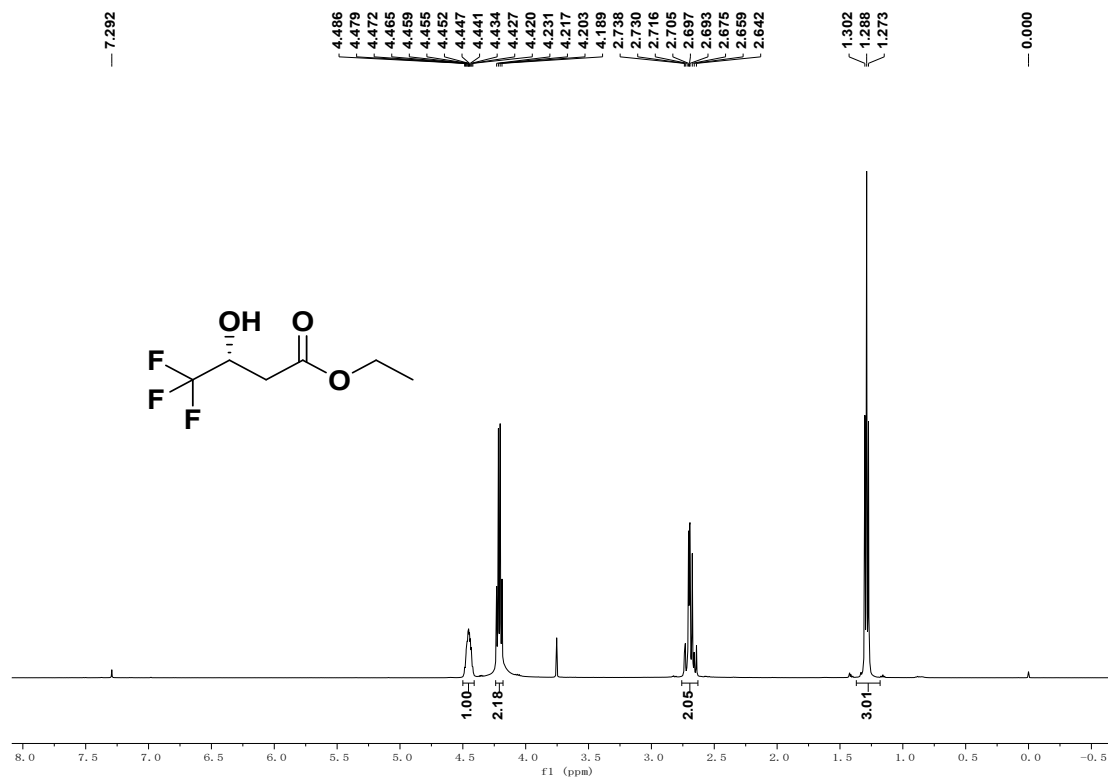

**Fig. S19** <sup>1</sup>H NMR (500 MHz) spectra of the ethyl (*R*)-4,4,4-trifluoro-3-hydroxybutyrate (**5i**) in CDCl<sub>3</sub>

## 10. HRMS spectra of the CPF-PILs

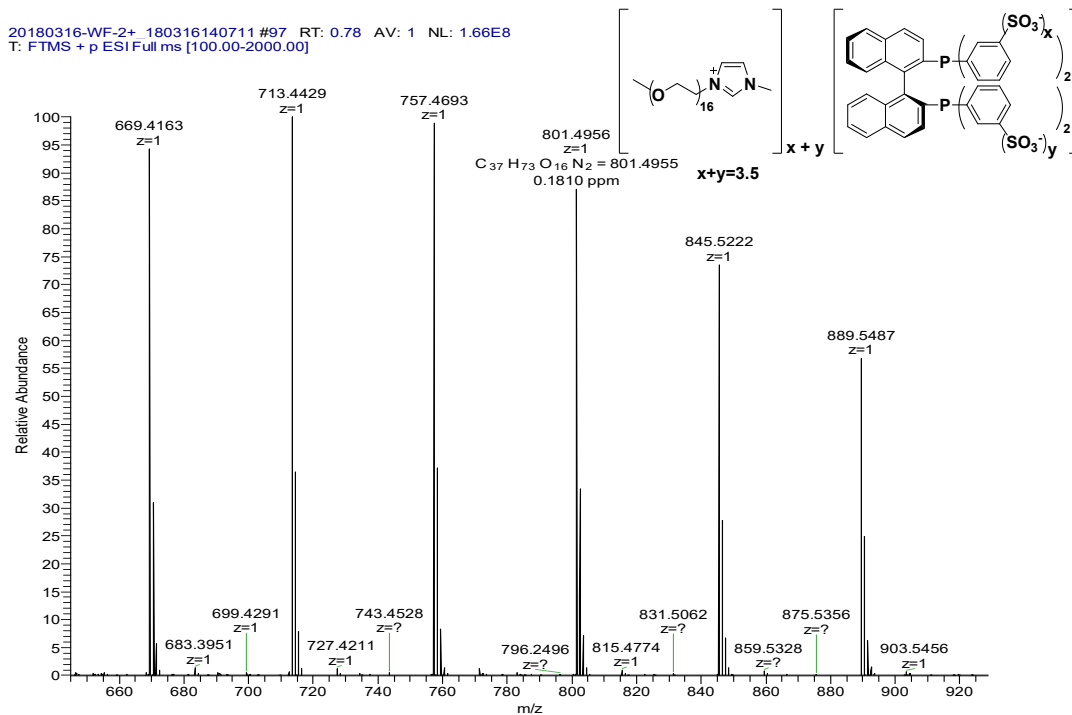

Fig. S20 Mass spectrum (ESI positive) of **3a**

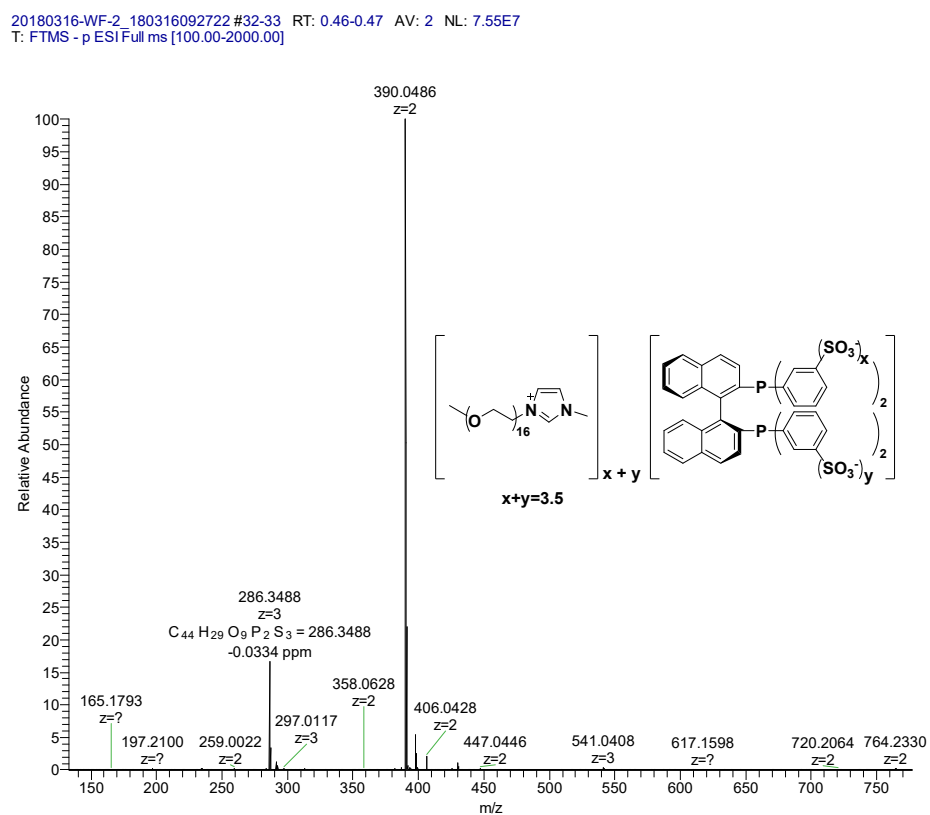

Fig. S21 Mass spectrum (ESI negative) of **3a**



20221024-5\_221024165838 #41 RT: 0.49 AV: 1 NL: 1.37E7  
T: FTMS - p ESI Full ms [70.00-1000.00]

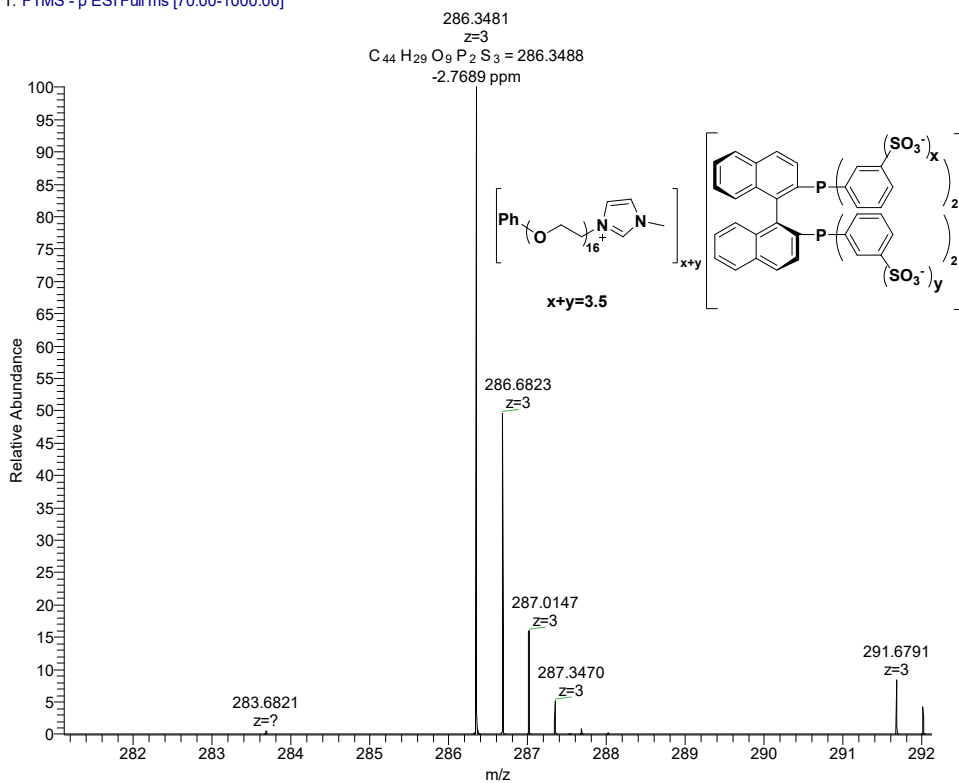

Fig. S24 Mass spectrum (ESI negative) of **3b**

20221024-5\_221024165838 #21 RT: 0.31 AV: 1 NL: 1.12E3  
T: FTMS - p ESI Full ms [70.00-1000.00]

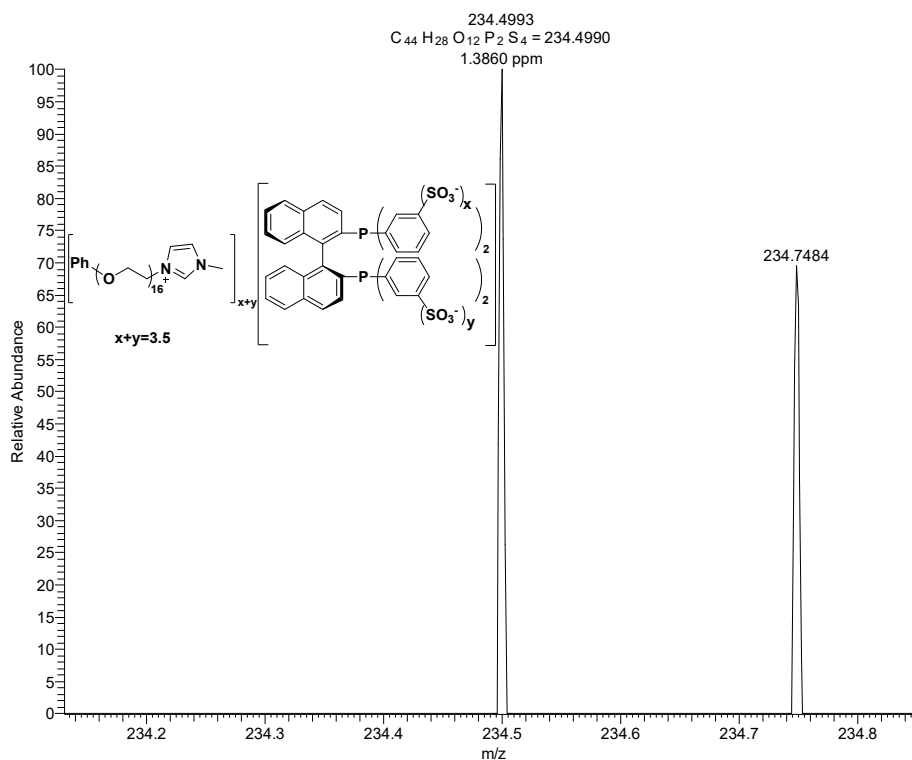

Fig. S25 Mass spectrum (ESI negative) of **3b**

## 11. Reference

- 1 H. L. Ngo, A. Hu and W. Lin, Highly enantioselective catalytic asymmetric hydrogenation of  $\beta$ -keto esters in room temperature ionic liquids, *Chem. Commun.*, 2003, **15**, 1912–1913.
- 2 A. Hu, H. L. Ngo and W. Lin, Remarkable 4,4'-substituent effects on BINAP: highly enantioselective Ru catalysts for asymmetric hydrogenation of  $\beta$ -aryl ketoesters and their immobilization in room-temperature ionic liquids, *Angew. Chem. Int. Ed.*, 2004, **116**, 2555–2558.
- 3 X. Jin, F. Kong, Z. Yang and F. Cui, Synthesis of BINAP ligands with imidazole tags for highly enantioselective Ru-catalyzed asymmetric hydrogenation of  $\beta$ -keto esters in ionic liquid systems, *J. Mol. Catal. A-Chem.*, 2013, **374**, 22–26.
- 4 T. Floris, P. Kluson, L. Bartek and H. Pelantova, Quaternary ammonium salts ionic liquids for immobilization of chiral Ru-BINAP complexes in asymmetric hydrogenation of  $\beta$ -ketoesters, *Appl. Catal. A*, 2009, **366**, 160–165.
- 5 O. V. Turova, I. V. Kuchurov, E. V. Starodubtseva, V. A. Ferapontov, N. S. Ikonnikov, S. G. Zlotin and M. G. Vinogradov, Ru-BINAP-catalyzed asymmetric hydrogenation of keto esters in high pressure carbon dioxide, *Mendeleev Commun.*, 2012, **4**, 184–186.
- 6 M. Berthod, J. M. Joerger, G. Mignani, M. Vaultier and M. Lemaire, Enantioselective catalytic asymmetric hydrogenation of ethyl acetoacetate in room temperature ionic liquids, *Tetrahedron: Asymmetry*, 2004, **15**, 2219–2221.
- 7 A. Wolfson, I. F. J. Vankelecom and P. A. Jacobs, The role of additional solvents in transition metal complex catalyzed asymmetric reductions in ionic liquid containing systems, *J. organomet. chem.*, 2005, **690**, 3558–3566.
- 8 E. Öchsner, M. J. Schneidera, C. Meyera, M. Haumannb and P. Wasserscheid, Challenging the scope of continuous, gas-phase reactions with supported ionic liquid phase (SILP) catalysts—Asymmetric hydrogenation of methyl acetoacetate, *Appl. Catal., A*, 2011, **399**, 35–41.
- 9 M. Berthod, C. Saluzzo, G. Mignani and M. Lemaire, 4, 4' and 5, 5'-DiamBINAP as a hydrosoluble chiral ligand: syntheses and use in Ru(II) asymmetric biphasic catalytic hydrogenation, *Tetrahedron: Asymmetry*, 2004, **15**, 639–645.
- 10 T. Lamouille, C. Saluzzo, R. T. Halle and F. L. Guyader, Hydrogenation of ethyl acetoacetate catalyzed by hydrosoluble BINAP derivatives, *Tetrahedron Lett.*, 2001, **42**, 663–664.
- 11 X. Jin, S. Huang, F. Wang, L. Zhu, H. Song, C. Xie, S. Yu and S. Li, Synthesis and characterization of a high-purity chiral 5,5'-disulfonato-BINAP ligand and its application in asymmetric hydrogenation of  $\beta$ -keto esters, *Mol. Catal.*, 2021, **507**, 111562.
- 12 Y.-Y. Huang, Y.-M. He, H.-F. Zhou, L. Wu, B.-L. Li and Q.-H. Fan, Thermomorphic system with non-fluorous phase-tagged Ru (BINAP) catalyst: Facile liquid/solid catalyst separation and application in asymmetric hydrogenation *J. Org. Chem.*, 2006, **71**, 2874–2877.
